# Supplementary material
Source: PubMed Central journal article supplement (PMC6318015)
Supplement: NIHMS1511723-supplement-1.pdf [file NIHMS1511723-supplement-1.pdf]

## MDM2-recruiting PROTAC Offers Superior, Synergistic Anti-proliferative Activity via Simultaneous Degradation of BRD4 and Stabilization of p53

John Hines<sup>1</sup>, Schan Lartigue<sup>1</sup>, Hanqing Dong<sup>2</sup>, Yimin Qian<sup>2</sup> and Craig M. Crews<sup>1,3,4</sup>

<sup>1</sup>Department of Molecular, Cellular and Developmental Biology, Yale University, New Haven, Connecticut 06520; <sup>2</sup>Arvinas, LLC, New Haven, Connecticut 06511; <sup>3</sup>Department of Chemistry, Yale University, New Haven, Connecticut 06520; <sup>4</sup>Department of Pharmacology, Yale University, New Haven, Connecticut 06520

### Supplementary Data File – Table S1

| compound concentration (μM) | mean % inhibition by JQ1 | E <sub>J</sub> | mean % inhibition by idasanutlin | E <sub>N</sub> | mean % inhibition by A1874 | E <sub>A</sub> | CI   |
|-----------------------------|--------------------------|----------------|----------------------------------|----------------|----------------------------|----------------|------|
| 0.01                        | 0.4 %                    | 0.004          | 12.2 %                           | 0.122          | 2.4 %                      | 0.024          | 5.20 |
| 0.025                       | 0.0 %                    | 0.000          | 16.2 %                           | 0.162          | 0.7 %                      | 0.007          | 23.1 |
| 0.10                        | 7.9 %                    | 0.079          | 37.7 %                           | 0.377          | 9.2 %                      | 0.092          | 4.60 |
| 0.25                        | 3.6 %                    | 0.036          | 47.7 %                           | 0.477          | 53.7 %                     | 0.537          | 0.92 |
| 1.00                        | 7.2 %                    | 0.072          | 59.1 %                           | 0.591          | 96.5 %                     | 0.965          | 0.64 |
| 2.50                        | 9.0 %                    | 0.090          | 60.6 %                           | 0.606          | 98.6 %                     | 0.986          | 0.65 |
| 10.0                        | 15.1 %                   | 0.151          | 64.4 %                           | 0.644          | 96.8 %                     | 0.968          | 0.72 |

### Supplementary Table S1: Bliss Independence analysis of A1874 activities in A375 cells

The percentage cell inhibition (compared to vehicle-treated control cells) for each compound at each concentration from Figure 3B was converted to their decimal equivalents (E<sub>J</sub> for JQ1; E<sub>N</sub> for idasanutlin; E<sub>A</sub> for A1874) and the Combination Index (CI) value was derived as explained in the Experimental Methods. CI values <1 indicate synergy.
