# Supplementary material
Source: PubMed Central journal article supplement (PMC6318015)
Supplement: NIHMS1511723-supplement-2.pdf [file NIHMS1511723-supplement-2.pdf]

# MDM2-recruiting PROTAC Offers Superior, Synergistic Anti-proliferative Activity via Simultaneous Degradation of BRD4 and Stabilization of p53

John Hines<sup>1</sup>, Schan Lartigue<sup>1</sup>, Hanqing Dong<sup>2</sup>, Yimin Qian<sup>2</sup> and Craig M. Crews<sup>1,3,4</sup>

<sup>1</sup>Department of Molecular, Cellular and Developmental Biology, Yale University, New Haven, Connecticut 06520; <sup>2</sup>Arvinas, LLC, New Haven, Connecticut 06511; <sup>3</sup>Department of Chemistry, Yale University, New Haven, Connecticut 06520; <sup>4</sup>Department of Pharmacology, Yale University, New Haven, Connecticut 06520

## Supplementary Data File – Fig. S1

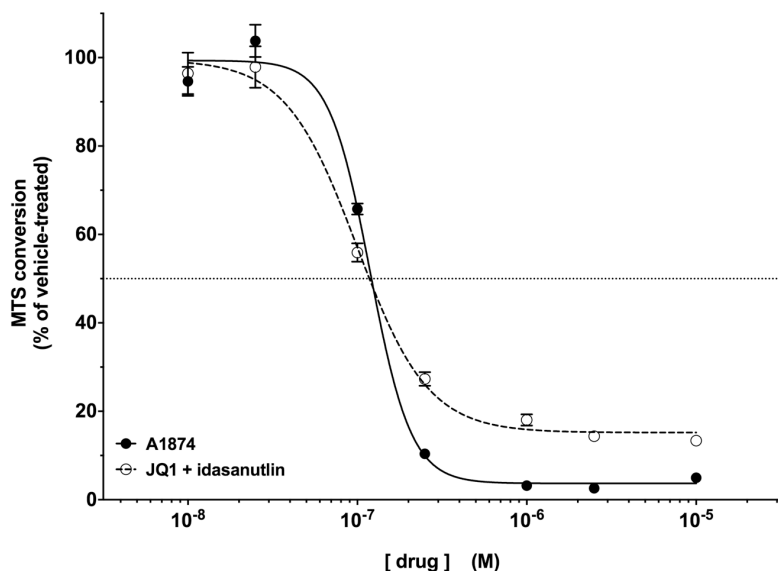

**Supplementary Figure S1: Comparison of PROTAC activity to that of combination treatment.** Cell viability assay of HCT1116 cells treated with increasing concentrations of either the PROTAC A1874 or a combination of its component ligands (JQ1 and idasanutlin) in equimolar amounts.
